# Supplementary material
Source: PubMed Central journal article supplement (PMC2075134)

Suppl. Fig. 1

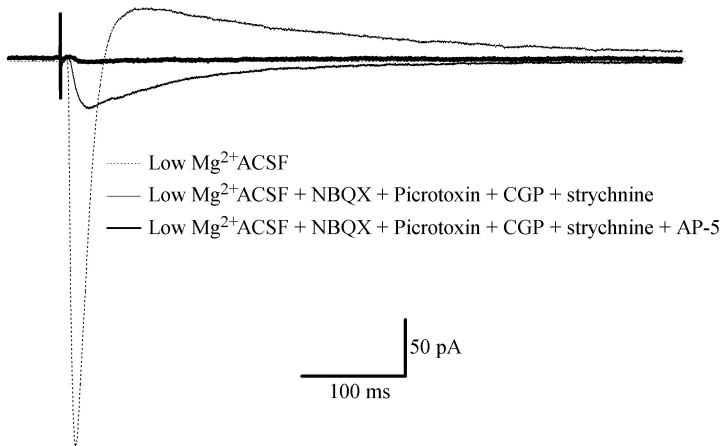

Supplement: jphysiol_2006.116178_1.pdf [file jphysiol_2006.116178_1.pdf]

Suppl. Fig. 2

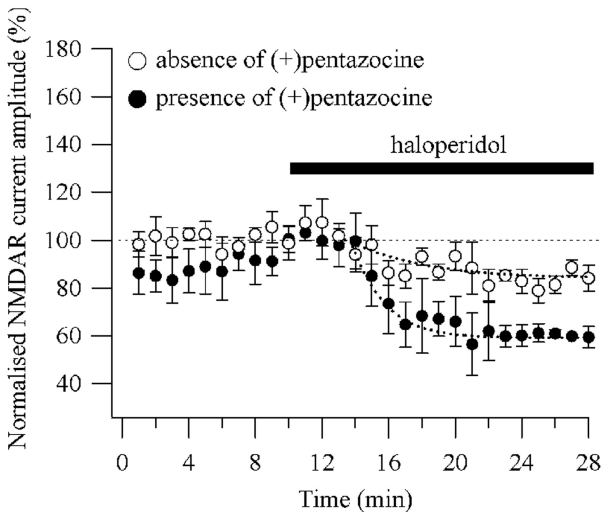

Supplement: jphysiol_2006.116178_2.pdf [file jphysiol_2006.116178_2.pdf]

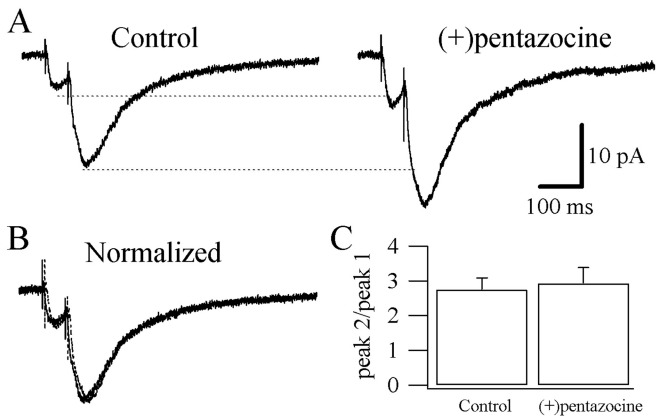

Supplement: jphysiol_2006.116178_3.pdf [file jphysiol_2006.116178_3.pdf]

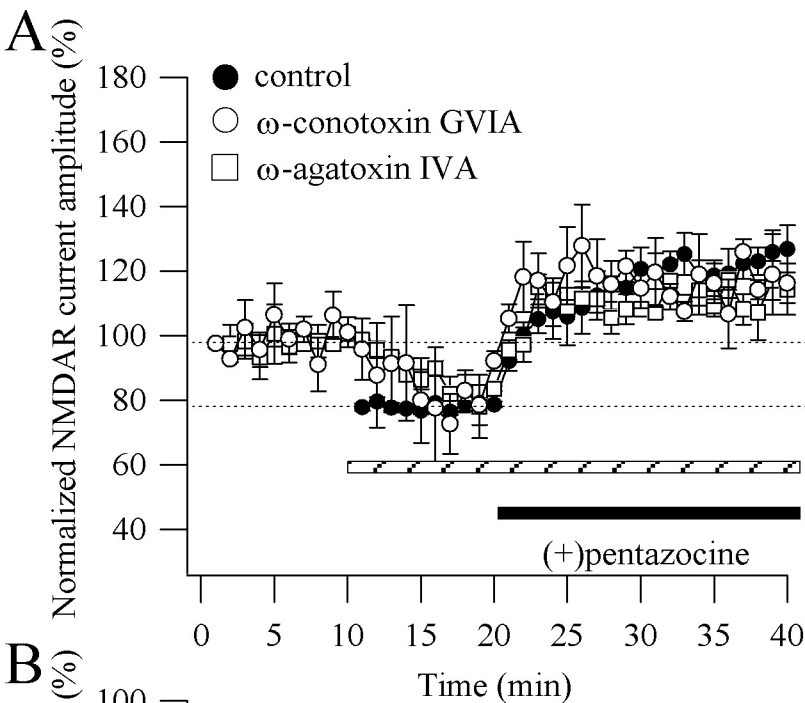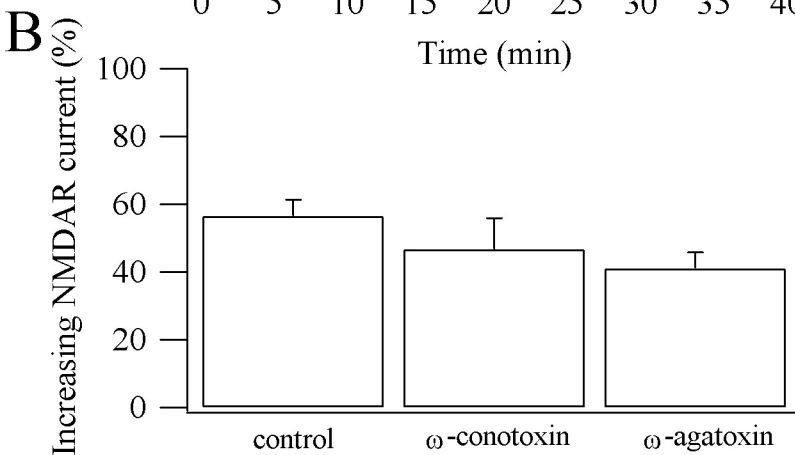

Supplement: jphysiol_2006.116178_4.pdf [file jphysiol_2006.116178_4.pdf]

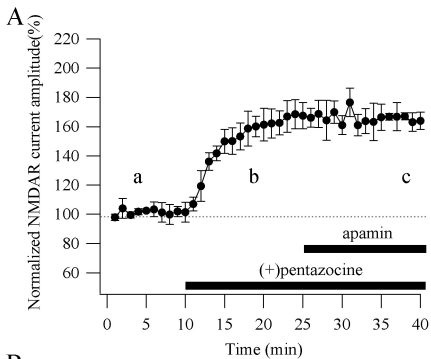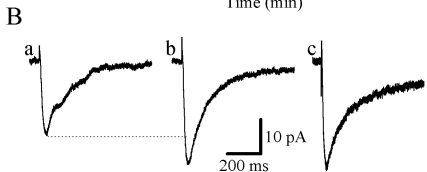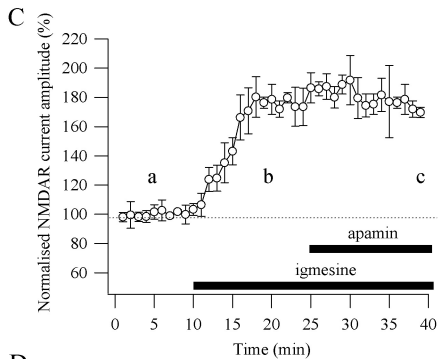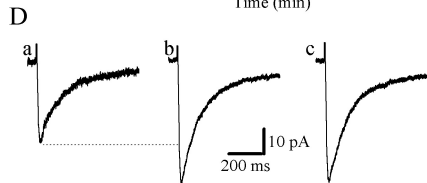

Supplement: jphysiol_2006.116178_5.pdf [file jphysiol_2006.116178_5.pdf]

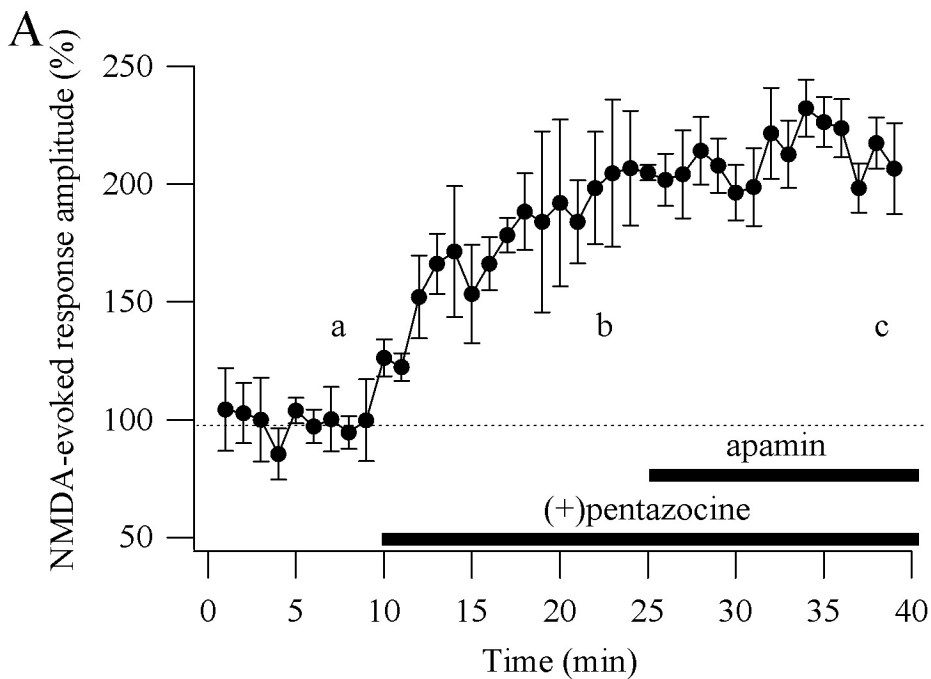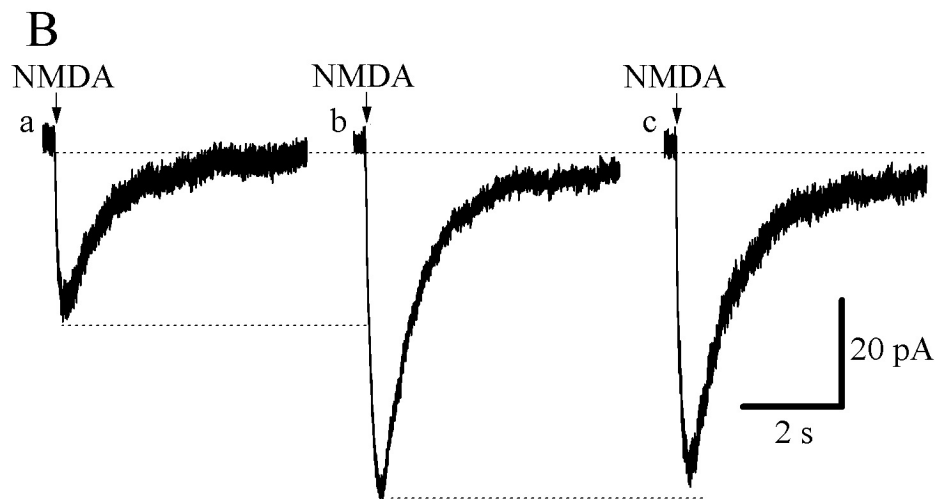

Supplement: jphysiol_2006.116178_6.pdf [file jphysiol_2006.116178_6.pdf]

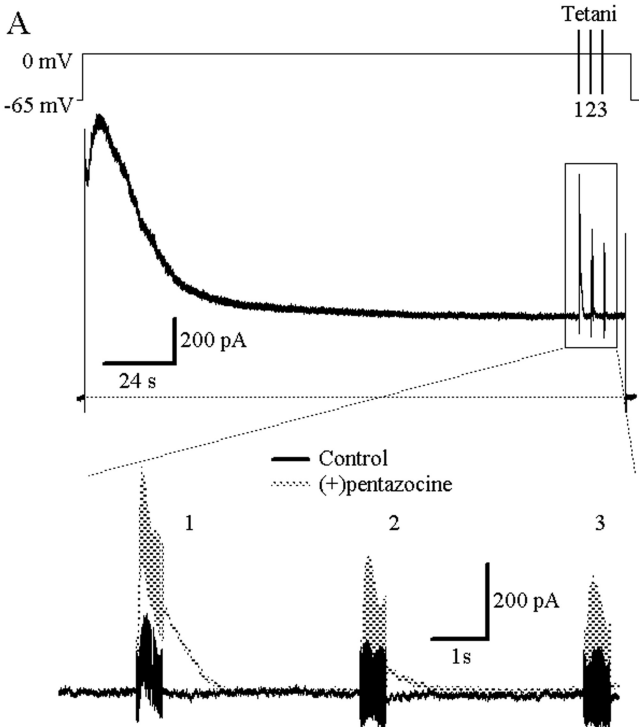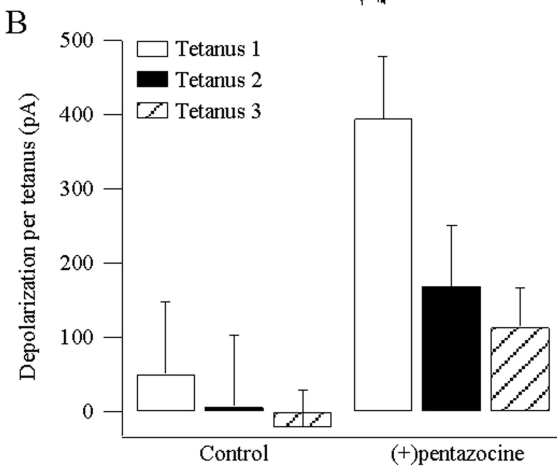

Supplement: jphysiol_2006.116178_7.pdf [file jphysiol_2006.116178_7.pdf]
